# Supplementary material for: Genetic Architecture of Plasma Adiponectin Overlaps With the Genetics of Metabolic Syndrome–Related Traits
Source: PubMed Central journal article supplement — Diabetes Care. 2010 Jan 12;33(4):908–13. doi: 10.2337/dc09-1385 (PMC2845050; doi:10.2337/dc09-1385), 2010-01-12
Supplement: supp_dc09-1385_dc09-1385_online_appendix.pdf [file supp_dc09-1385_dc09-1385_online_appendix.pdf]

**Supplemental table 1: Metabolic syndrome definition according to the International Diabetes Federation (IDF, 2006)<sup>a</sup>**

|                                  |                      |
|----------------------------------|----------------------|
| ♂ Waist circumference (cm)       | ≥ 94                 |
| ♀ Waist circumference (cm)       | ≥ 80                 |
| Fasting plasma glucose (mmol/L)  | ≥ 5.6 <sup>b,c</sup> |
| Systolic bloodpressure (mm Hg)   | ≥ 130 <sup>c</sup>   |
| Diastolic blood pressure (mm Hg) | ≥ 85 <sup>c</sup>    |
| ♂ HDL-Cholesterol (mmol/L)       | < 1.03 <sup>c</sup>  |
| ♀ HDL-Cholesterol (mmol/L)       | < 1.29 <sup>c</sup>  |
| Triglycerides (mmol/L)           | ≥ 1.7 <sup>c</sup>   |

<sup>a</sup> Europids

<sup>b</sup> included previously diagnosed type 2 diabetes patients

<sup>c</sup> included treatment patients.

**Supplemental table 2: Partial correlation coefficients of plasma adiponectin with the MetS, its individual components and MetS related traits.**

|                                                         | Women<br>(n=1258) | Men<br>(n=967) |
|---------------------------------------------------------|-------------------|----------------|
| <b>Metabolic syndrome and its individual components</b> |                   |                |
| Metabolic Syndrome                                      | -0.20 **          | -0.13 **       |
| Waist circumference                                     | -0.23 **          | -0.12 *        |
| Glucose                                                 | -0.10 **          | -0.04          |
| HDL-cholesterol                                         | 0.35 **           | 0.27 **        |
| Triglycerides                                           | -0.21 **          | -0.15 **       |
| SBP                                                     | -0.03             | 0.01           |
| DBP                                                     | 0.03              | -0.04          |
| <b>Metabolic syndrome related traits</b>                |                   |                |
| Body mass index ¥                                       | -0.29 **          | -0.20 **       |
| Insulin                                                 | -0.17 **          | -0.10 **       |
| HOMA-IR                                                 | -0.18 **          | -0.10 **       |
| CRP                                                     | -0.12 **          | -0.08 *        |

SBP: systolic blood pressure; DBP: diastolic blood pressure; HOMA-IR: Homeostatic Model Assessment-Insulin Resistance; CRP: C-reactive protein. Partial correlation coefficient: \* P-value < 0.05; \*\* P-value < 0.01, covariates age and body mass index, ¥ covariate age only.

**Supplemental table 3: Gender specific heritability of the MetS related traits**

|             | Women     |     |                    | Men       |     |                    | $\rho_G$ | SE   | P    |
|-------------|-----------|-----|--------------------|-----------|-----|--------------------|----------|------|------|
|             | $h^2$ (%) | SE  | P                  | $h^2$ (%) | SE  | P                  |          |      |      |
| Adiponectin | 52.9      | 6.5 | <10 <sup>-15</sup> | 59.6      | 7.5 | <10 <sup>-14</sup> | 100.0    | -    | -    |
| Insulin     | 28.2      | 7.4 | <10 <sup>-03</sup> | 21.6      | 7.3 | <10 <sup>-03</sup> | 100.0    | -    | -    |
| HOMA-IR     | 28.1      | 7.7 | <10 <sup>-03</sup> | 24.5      | 9.4 | <10 <sup>-03</sup> | 100.0    | -    | -    |
| CRP         | 32.2      | 8.1 | <10 <sup>-04</sup> | 17.1      | 9.8 | 0.08               | 91.7     | 28.6 | 0.77 |

$\rho_G$ : genetic correlation (%);  $\rho_E$ : environmental correlation (%). HOMA: Homeostatic Model Assessment-Insulin Resistance; CRP: C-reactive protein. P: P-values were derived using the  $\chi^2$  test.

**Supplemental table 4: Bayesian information criterion for 5 *ADIPOQ* SNPS with plasma adiponectin**

| nr        | rs822387 | rs17300539 | rs182052 | rs1501299 | rs6773957 | BIC/1000     |
|-----------|----------|------------|----------|-----------|-----------|--------------|
| 1         | 0        | 0          | 0        | 0         | 0         | 2.567        |
| 2         | 1        | 0          | 0        | 0         | 0         | 2.491        |
| 3         | 0        | 1          | 0        | 0         | 0         | 2.498        |
| 4         | 0        | 0          | 1        | 0         | 0         | 2.505        |
| 5         | 0        | 0          | 0        | 1         | 0         | 2.510        |
| 6         | 0        | 0          | 0        | 0         | 1         | 2.498        |
| 7         | 1        | 1          | 0        | 0         | 0         | 2.463        |
| 8         | 0        | 0          | 0        | 1         | 1         | 2.452        |
| 9         | 1        | 0          | 1        | 0         | 0         | 2.460        |
| 10        | 1        | 0          | 0        | 1         | 0         | 2.446        |
| 11        | 1        | 0          | 0        | 0         | 1         | 2.453        |
| 12        | 0        | 1          | 1        | 0         | 0         | 2.463        |
| 13        | 0        | 1          | 0        | 1         | 0         | 2.454        |
| 14        | 0        | 1          | 0        | 0         | 1         | 2.493        |
| 15        | 0        | 0          | 1        | 1         | 0         | 2.482        |
| 16        | 0        | 0          | 1        | 0         | 1         | 2.501        |
| 17        | 1        | 1          | 1        | 0         | 0         | 2.424        |
| 18        | 1        | 0          | 1        | 1         | 0         | 2.433        |
| 19        | 1        | 1          | 0        | 1         | 0         | 2.422        |
| 20        | 1        | 1          | 0        | 0         | 1         | 2.449        |
| 21        | 0        | 1          | 1        | 1         | 0         | 2.439        |
| 22        | 0        | 1          | 1        | 0         | 1         | 2.485        |
| 23        | 0        | 0          | 1        | 1         | 1         | 2.457        |
| 24        | 1        | 0          | 0        | 1         | 1         | 2.450        |
| 25        | 0        | 1          | 0        | 1         | 1         | 2.435        |
| 26        | 1        | 0          | 1        | 0         | 1         | 2.448        |
| 27        | 1        | 1          | 1        | 1         | 0         | 2.420        |
| <b>28</b> | <b>1</b> | <b>1</b>   | <b>1</b> | <b>0</b>  | <b>1</b>  | <b>2.410</b> |
| 29        | 0        | 1          | 1        | 1         | 1         | 2.441        |
| 30        | 1        | 1          | 0        | 1         | 1         | 2.426        |
| 31        | 1        | 0          | 1        | 1         | 1         | 2.439        |
| 32        | 1        | 1          | 1        | 1         | 1         | 2.413        |

Thirty two Bayesian information criterion (BIC) models based on the log-likelihood estimates, calculated using the parameters gender, age, BMI and SNP(s). N=1914. BIC presented as BIC/1000.
